# Supplementary material for: Oxidative Stress and Mitochondrial Damage in Dry Age-Related Macular Degeneration Like NFE2L2/PGC-1α -/- Mouse Model Evoke Complement Component C5a Independent of C3
Source: MDPI journal article supplement (doi:10.3390/biology10070622), 2021-07-04
Supplement: s1 [file s1]

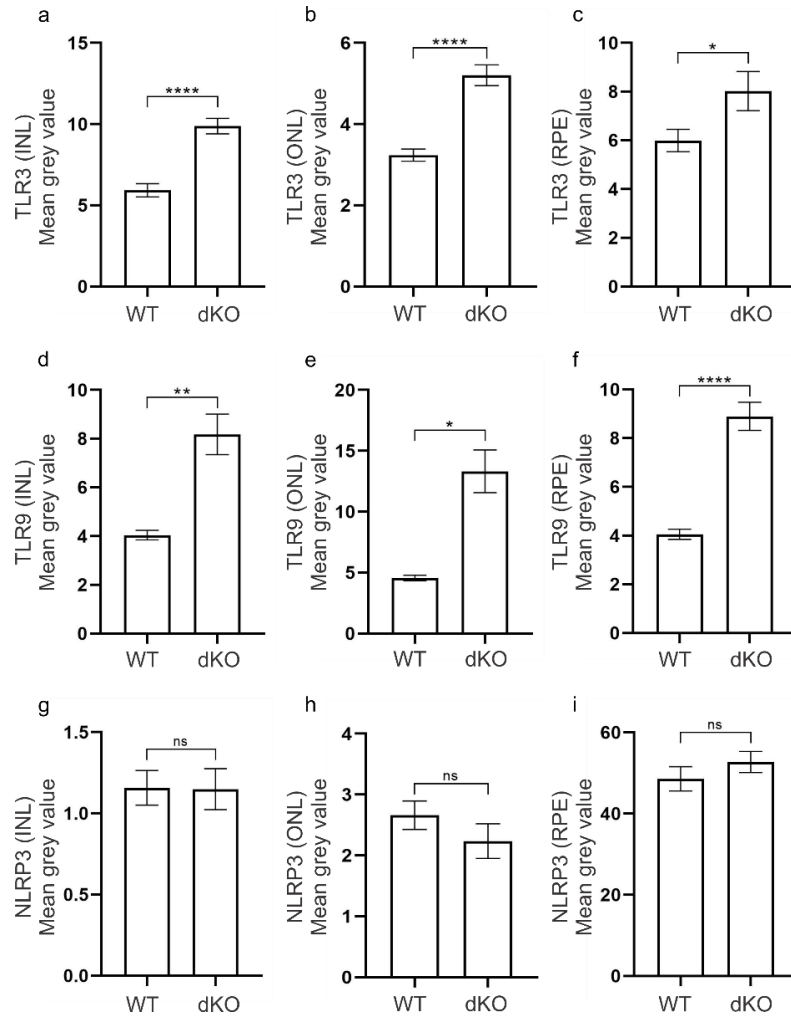

**Figure S1.** The TLR3 levels in INL ( $p < 0.0001$ ), ONL ( $p < 0.0001$ ) and RPE ( $p = 0.04$ ) layers of dKO animals were significantly increased compared to WT animals (**a**, **b** and **c**). Similarly, the TLR9 levels were significantly increased in dKO animals INL ( $p = 0.001$ ), ONL ( $p = 0.03$ ) and RPE ( $p < 0.0001$ ) layers (**d**, **e** and **f**). However, NLRP3 levels in remained unchanged in INL ( $p = 0.95$ ), followed by non-significant decrease by ~15% in ONL ( $p = 0.19$ ) and non-significant increase by ~8% in RPE ( $p = 0.35$ ) (**g**, **h** and **i**). INL (inner nuclear layer); ONL (outer nuclear layer); RPE (retinal epithelial layer).

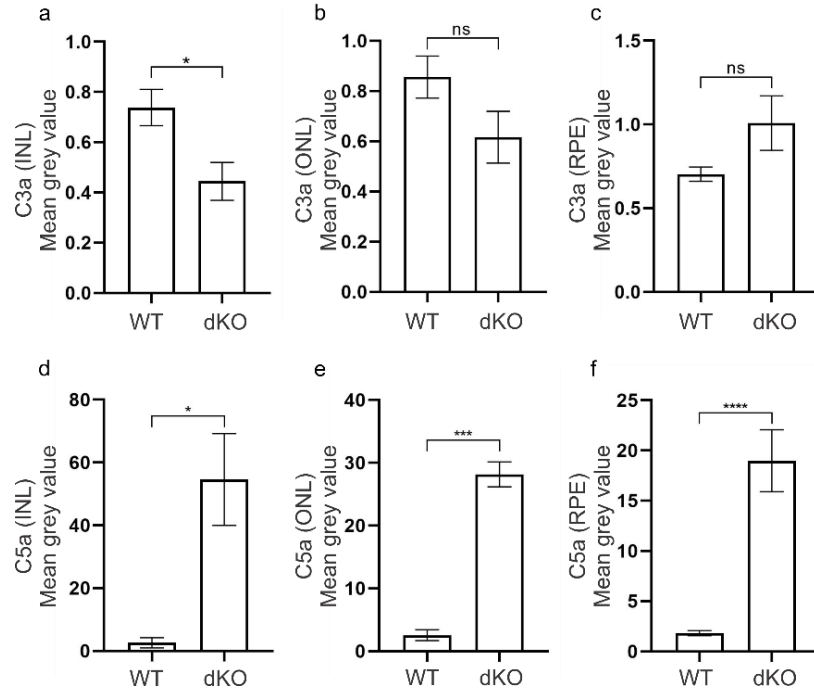

**Figure S2.** The C3a levels in INL significantly decreased by ~40% ( $p = 0.01$ ), followed by non-significant decrease by ~28% in ONL ( $p = 0.05$ ) and non-significant ~61% increase in RPE ( $p = 0.49$ ) layers of dKO animals compared to WT animals (a, b and c). The C5a levels were significantly increased in dKO animals INL ( $p = 0.02$ ), ONL ( $p < 0.001$ ) and RPE ( $p < 0.0001$ ) layers (d, e and f). INL (inner nuclear layer); ONL (outer nuclear layer); RPE (retinal epithelial layer).

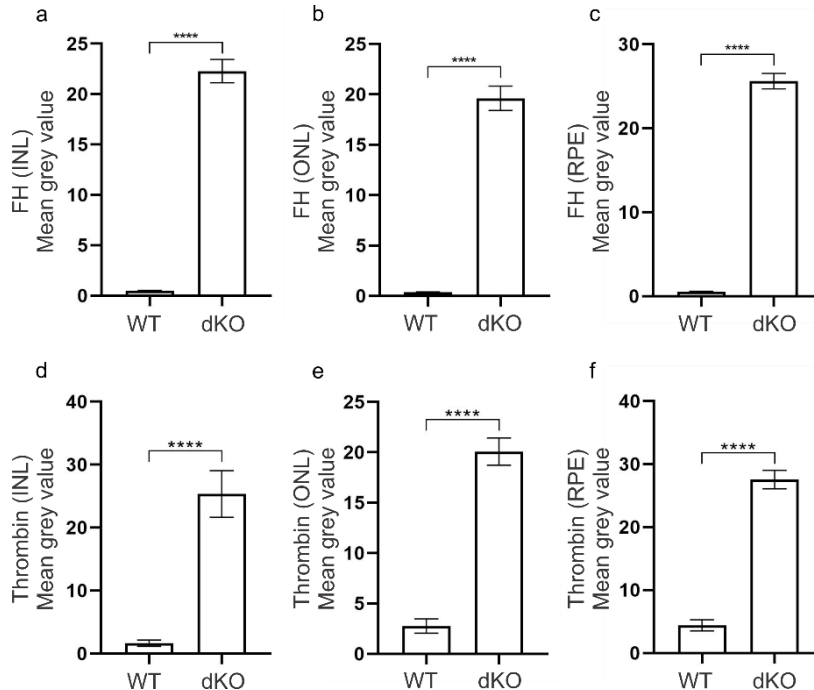

**Figure S3.** The FH levels in INL ( $p < 0.0001$ ), ONL ( $p < 0.0001$ ) and RPE ( $p < 0.0001$ ) layers of dKO animals were significantly increased compared to WT animals (a, b and c). Similarly, the thrombin levels were significantly increased in dKO animals INL ( $p = 0.0001$ ), ONL ( $p = 0.0001$ ) and RPE ( $p < 0.0001$ ) layers (d, e and f). INL (inner nuclear layer); ONL (outer nuclear layer); RPE (retinal epithelial layer).

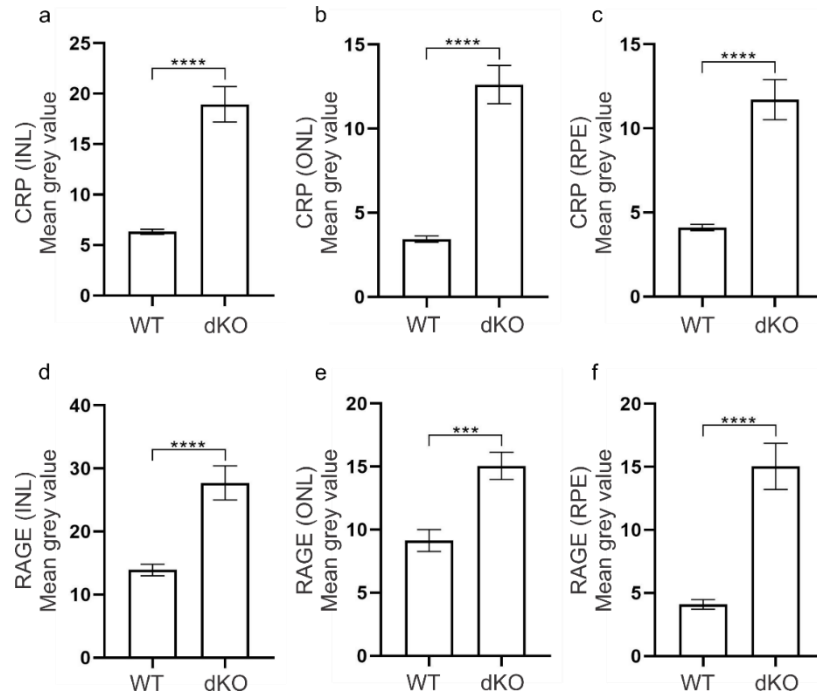

**Figure S4.** The CRP levels were significantly increased in dKO animals INL, ONL and RPE ( $p = 0.0001$ ;  $p = 0.0001$ ;  $p = 0.0001$ ), respectively compared to WT animals (a, b and c). The RAGE levels in INL ( $p < 0.0001$ ), ONL ( $p < 0.0001$ ) and RPE ( $p < 0.0001$ ) layers of dKO animals were significantly increased compared to WT animals (d, e and f). INL (inner nuclear layer); ONL (outer nuclear layer); RPE (retinal epithelial layer).
